# Supplementary material for: Subseasonal prediction of springtime Pacific–North American transport using upper-level wind forecasts
Source: Copernicus journal article supplement (doi:10.5194/wcd-2-433-2021), 2021-05-12
Supplement: Supplementary file 1 [file wcd-2-433-2021-supplement.pdf]

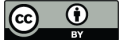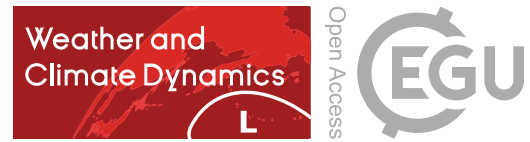

*Supplement of*

## **Subseasonal prediction of springtime Pacific–North American transport using upper-level wind forecasts**

**John R. Albers et al.**

*Correspondence to:* John R. Albers ([john.albers@noaa.gov](mailto:john.albers@noaa.gov))

The copyright of individual parts of the supplement might differ from the article licence.

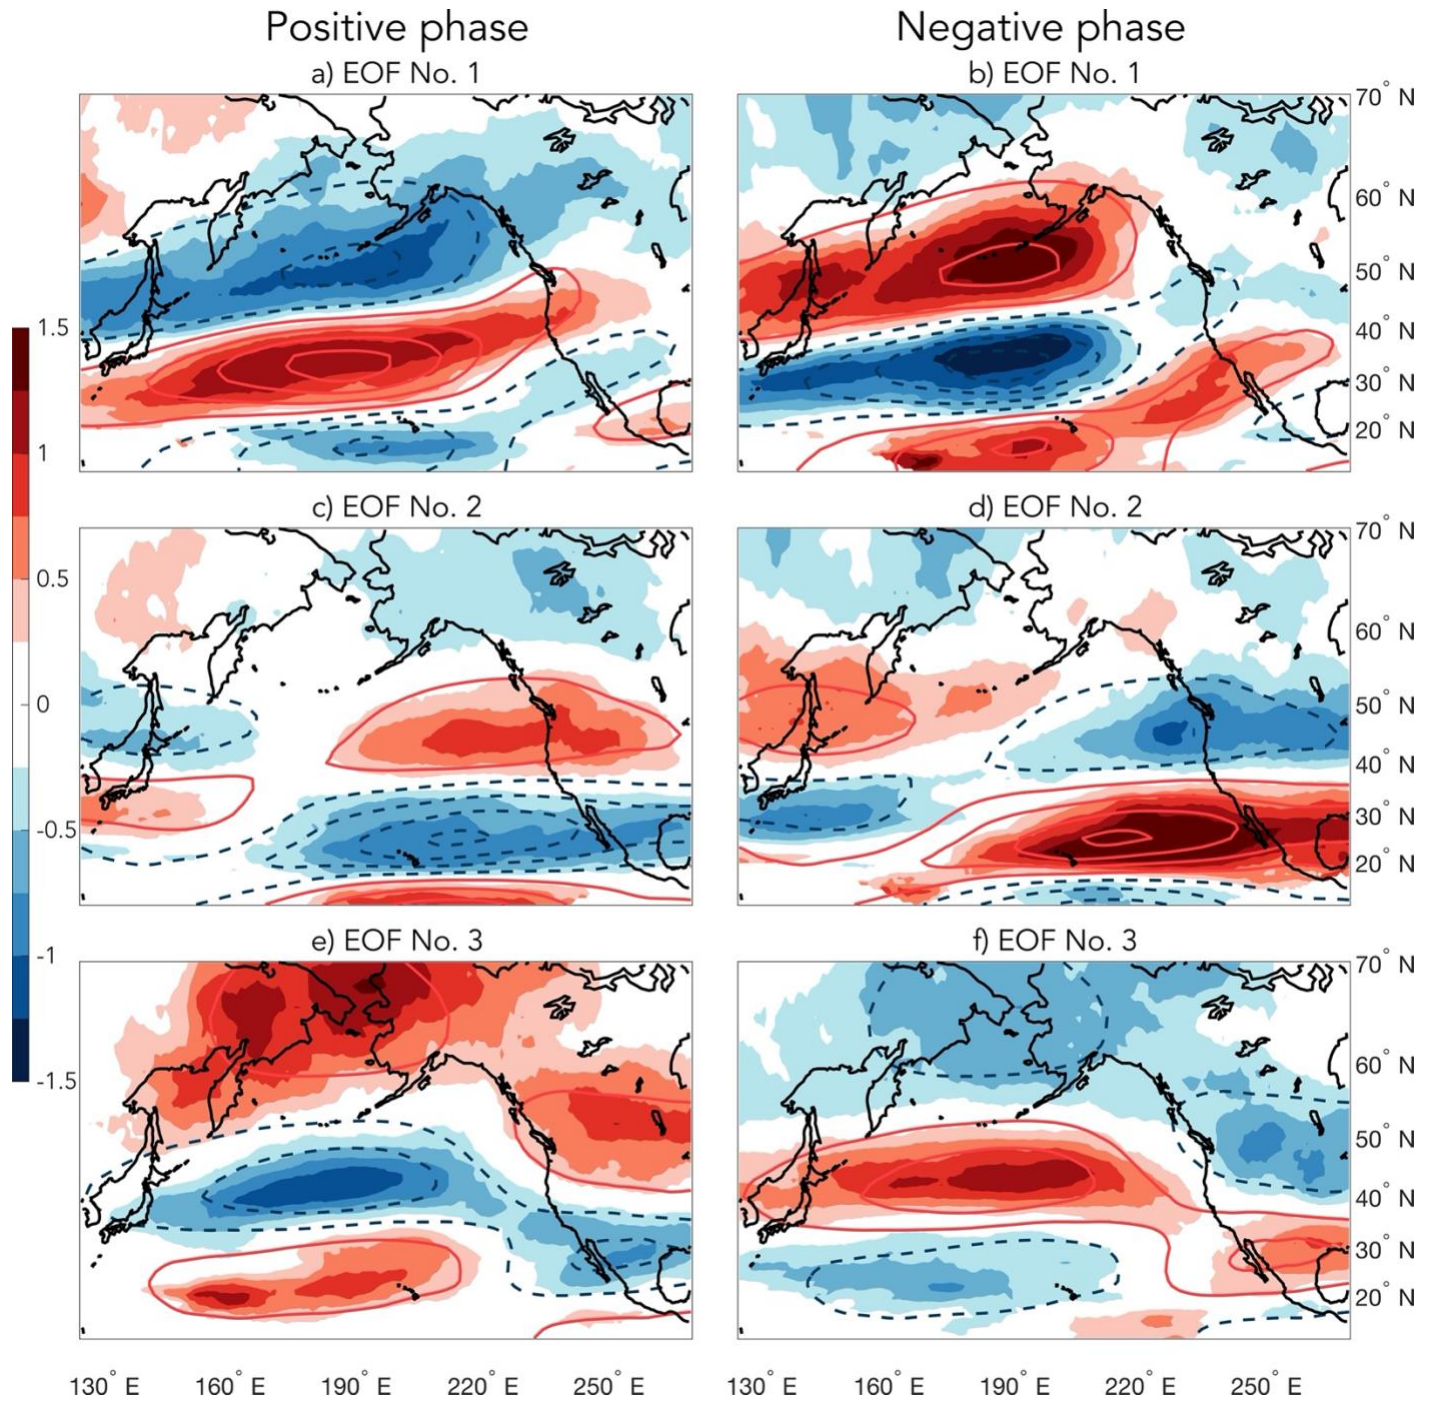

**Figure S1:** Monthly mean (MAM, 1979-2014) jet frequencies (filled contours) for time periods when PCs 1-3 are greater than  $\pm 1$  STDs from climatology (units of STDs). Colored contours show the EOF patterns associated with each composite.



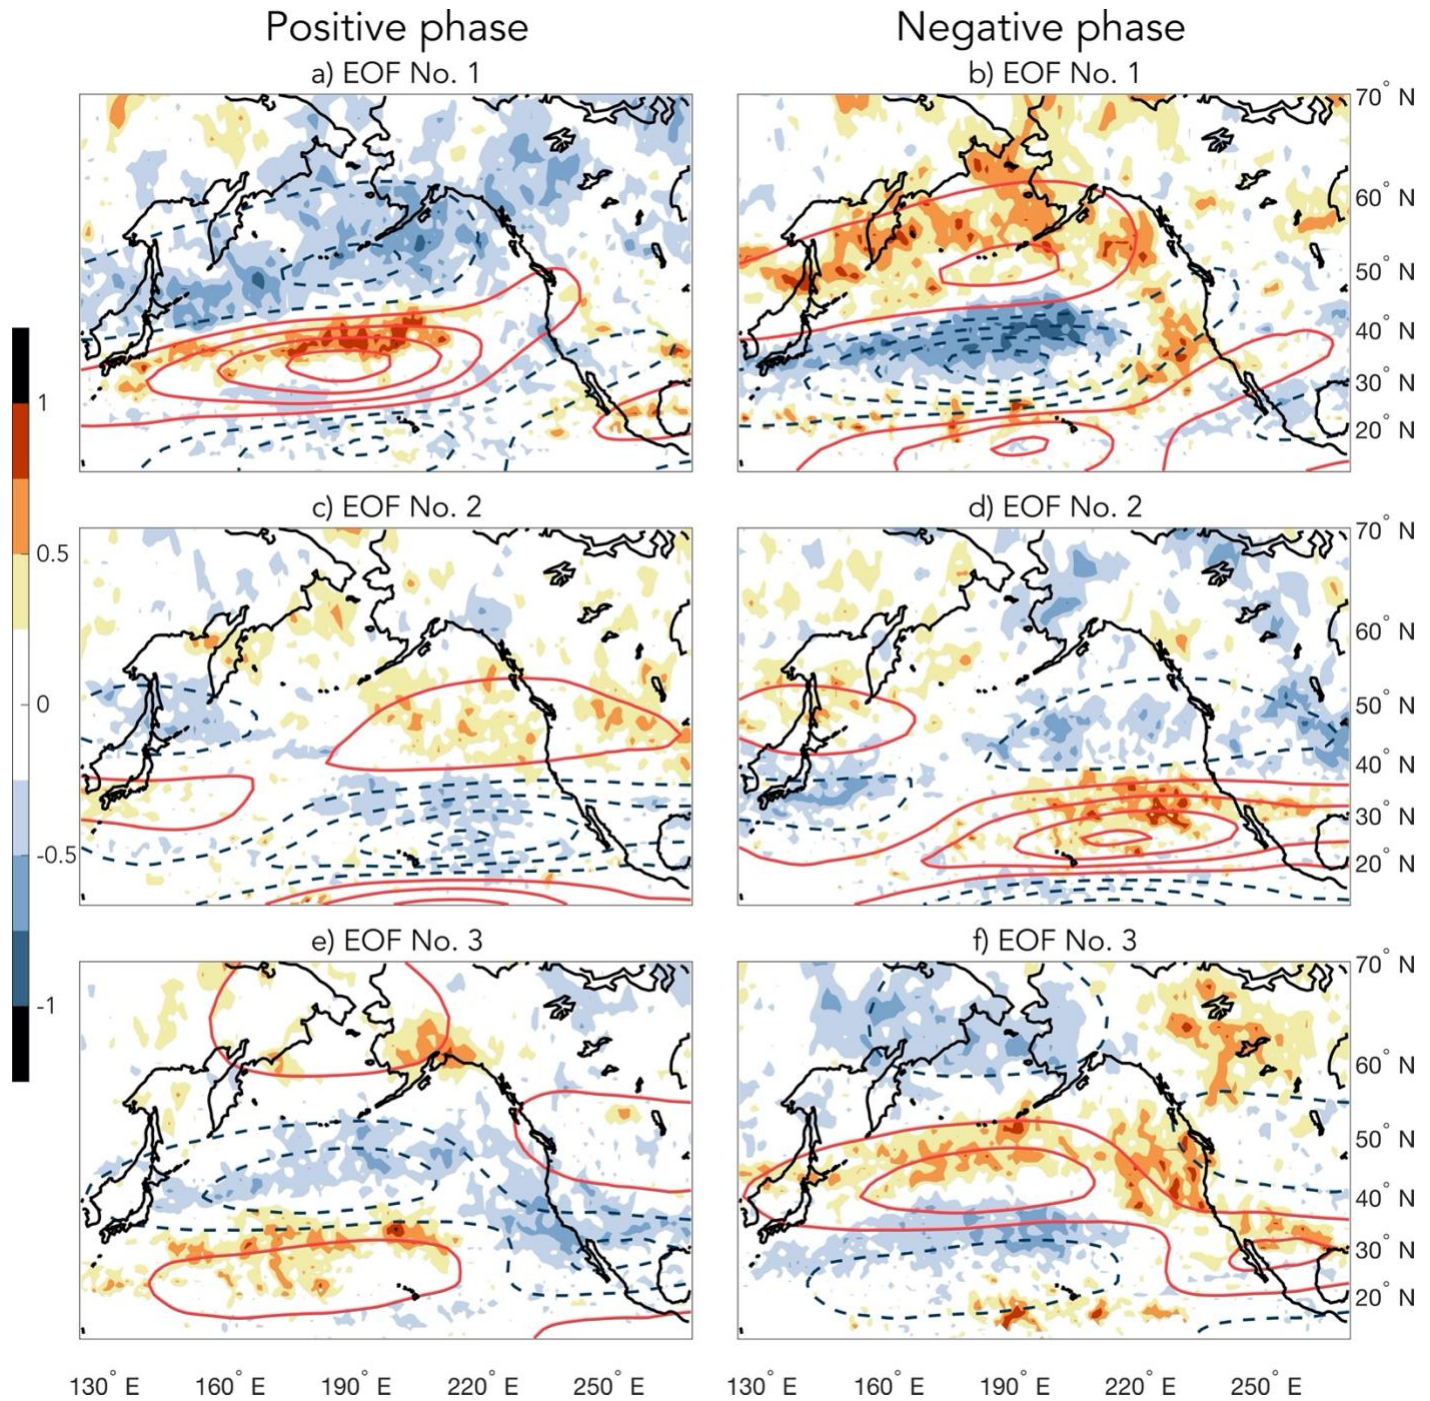

**Figure S2:** Monthly mean (MAM, 1979-2014) frequencies of STT to 500 hPa (filled contours) for time periods when PCs 1-3 are greater than  $\pm 1$  STDs from climatology (units of STDs). Colored contours show the EOF patterns associated with each composite.



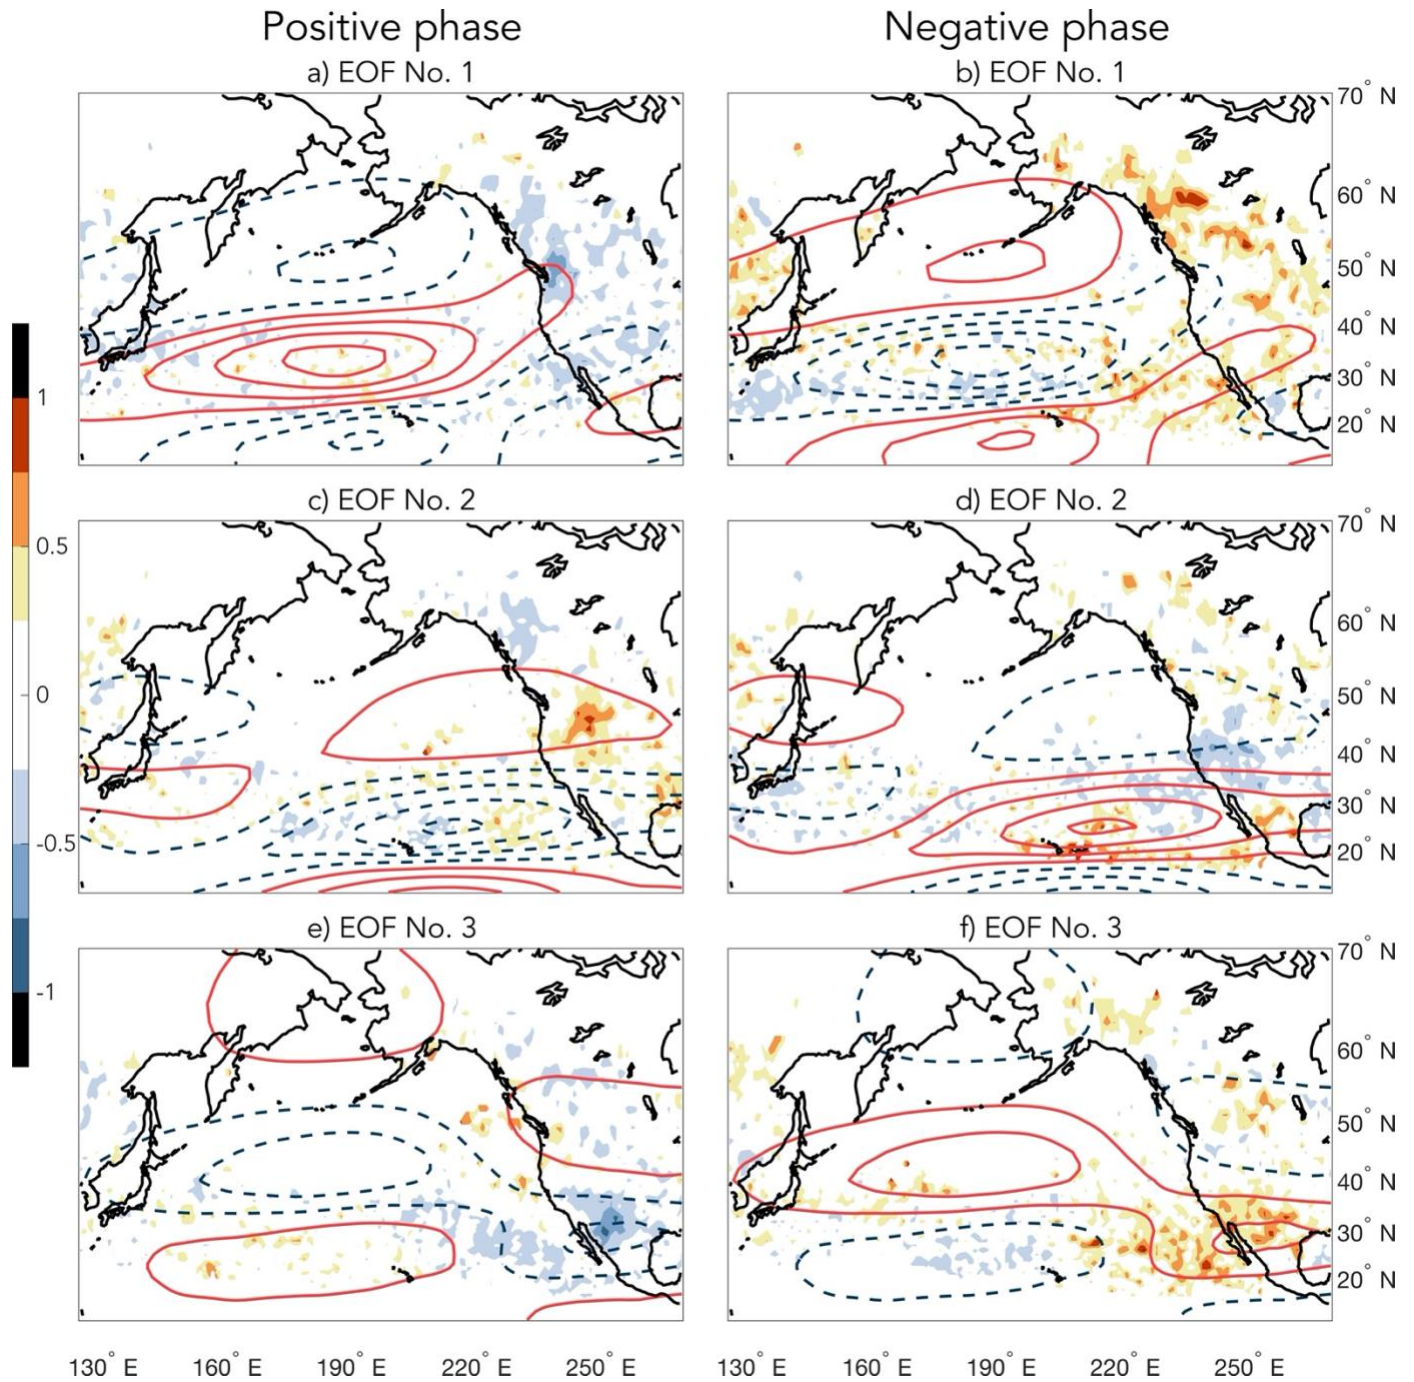

**Figure S3:** Monthly mean (MAM, 1979-2014) frequencies of STT to the PBL (filled contours) for time periods when PCs 1-3 are greater than  $\pm 1$  STDs from climatology (units of STDs). Colored contours show the EOF patterns associated with each composite.

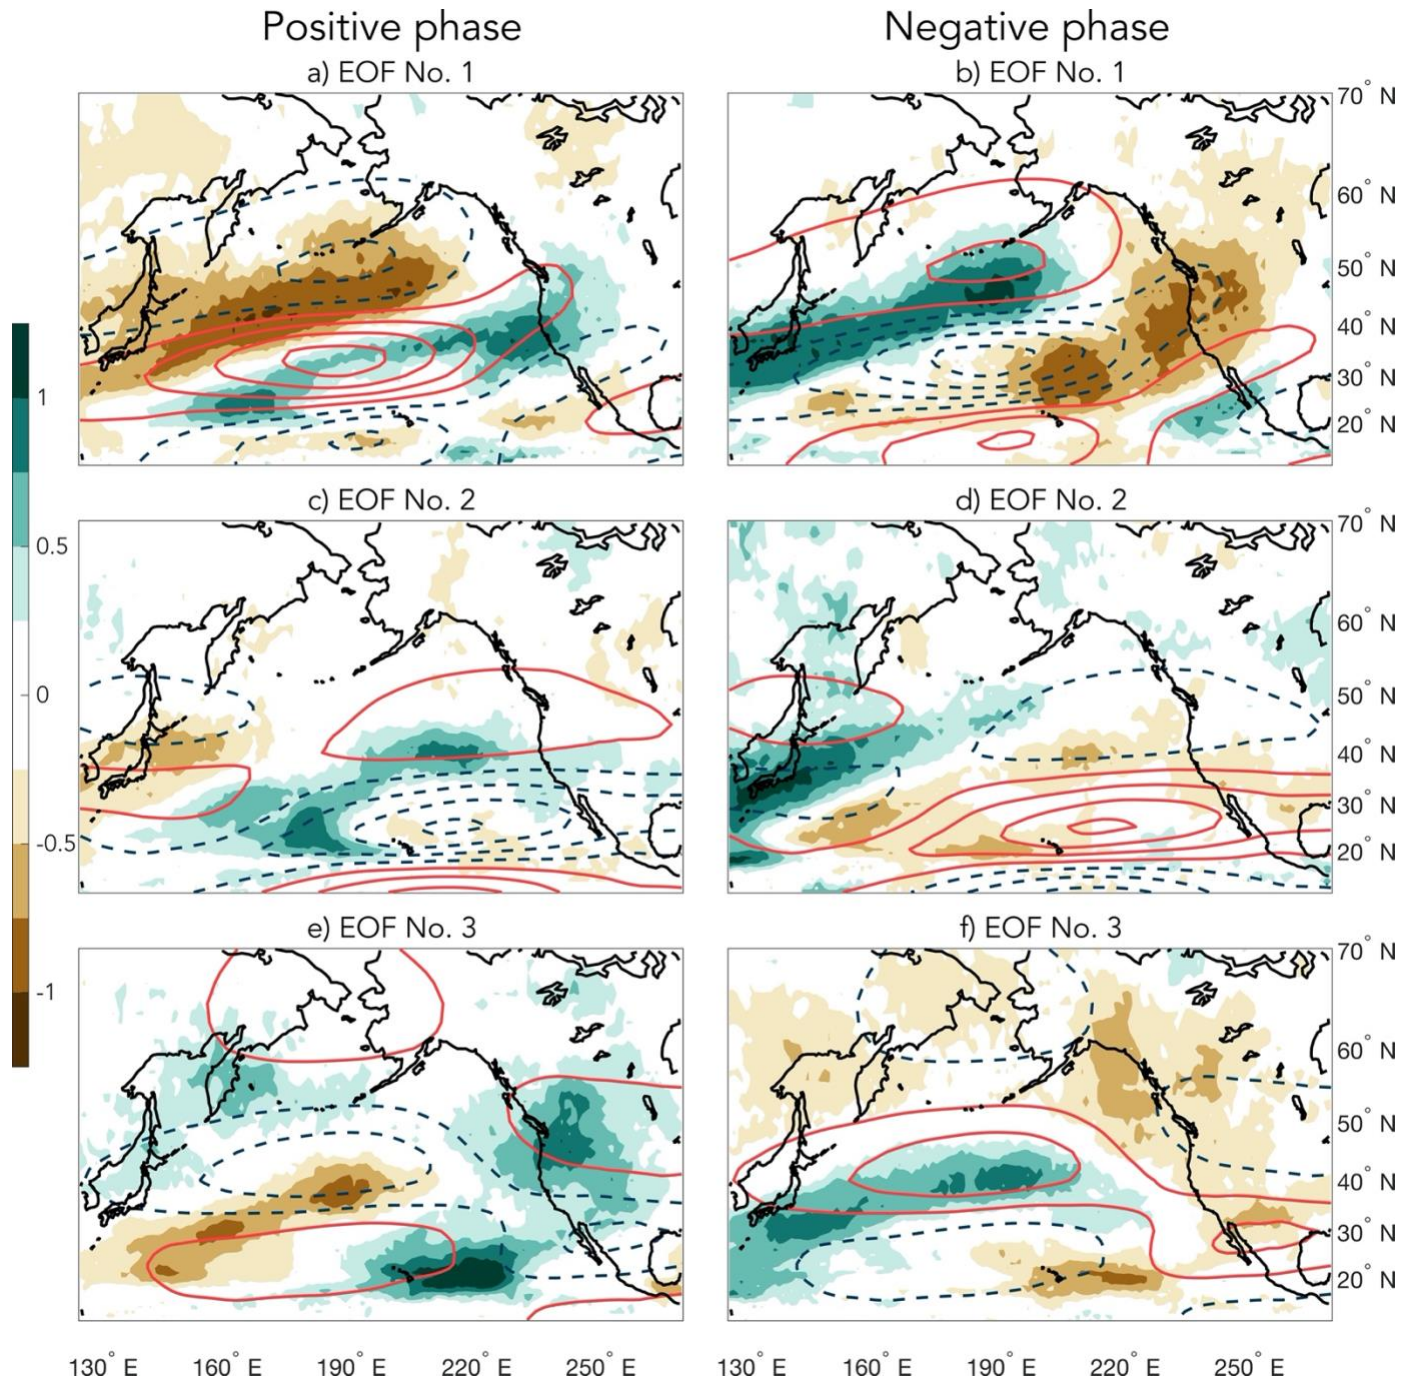

**Figure S4:** Monthly mean (MAM, 1979-2014) frequencies of TME (filled contours) for time periods when PCs 1-3 are greater than  $\pm 1$  STDs from climatology (units of STDs). Colored contours show the EOF patterns associated with each composite.



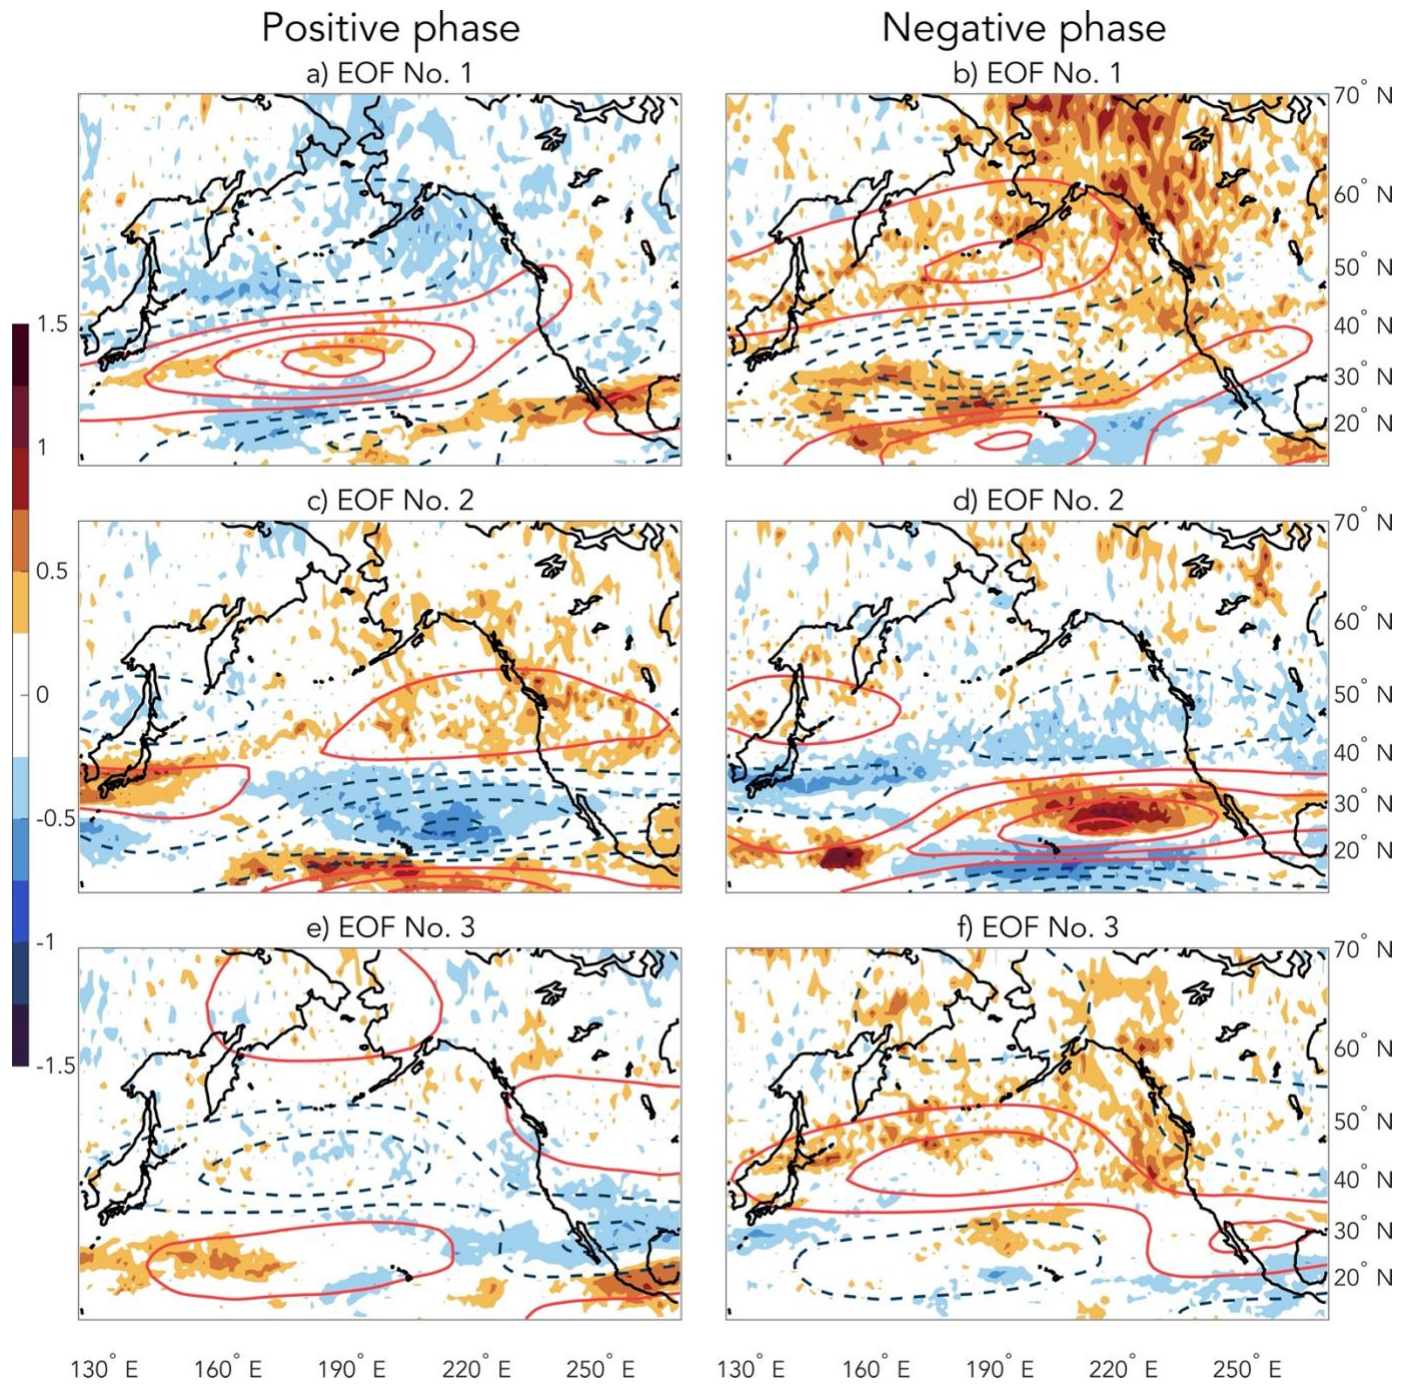

**Figure S5:** Monthly mean (MAM, 1979-2014) frequencies of shallow depth tropopause folds (filled contours) for time periods when PCs 1-3 are greater than  $\pm 1$  STDs from climatology (units of STDs). Colored contours show the EOF patterns associated with each composite.



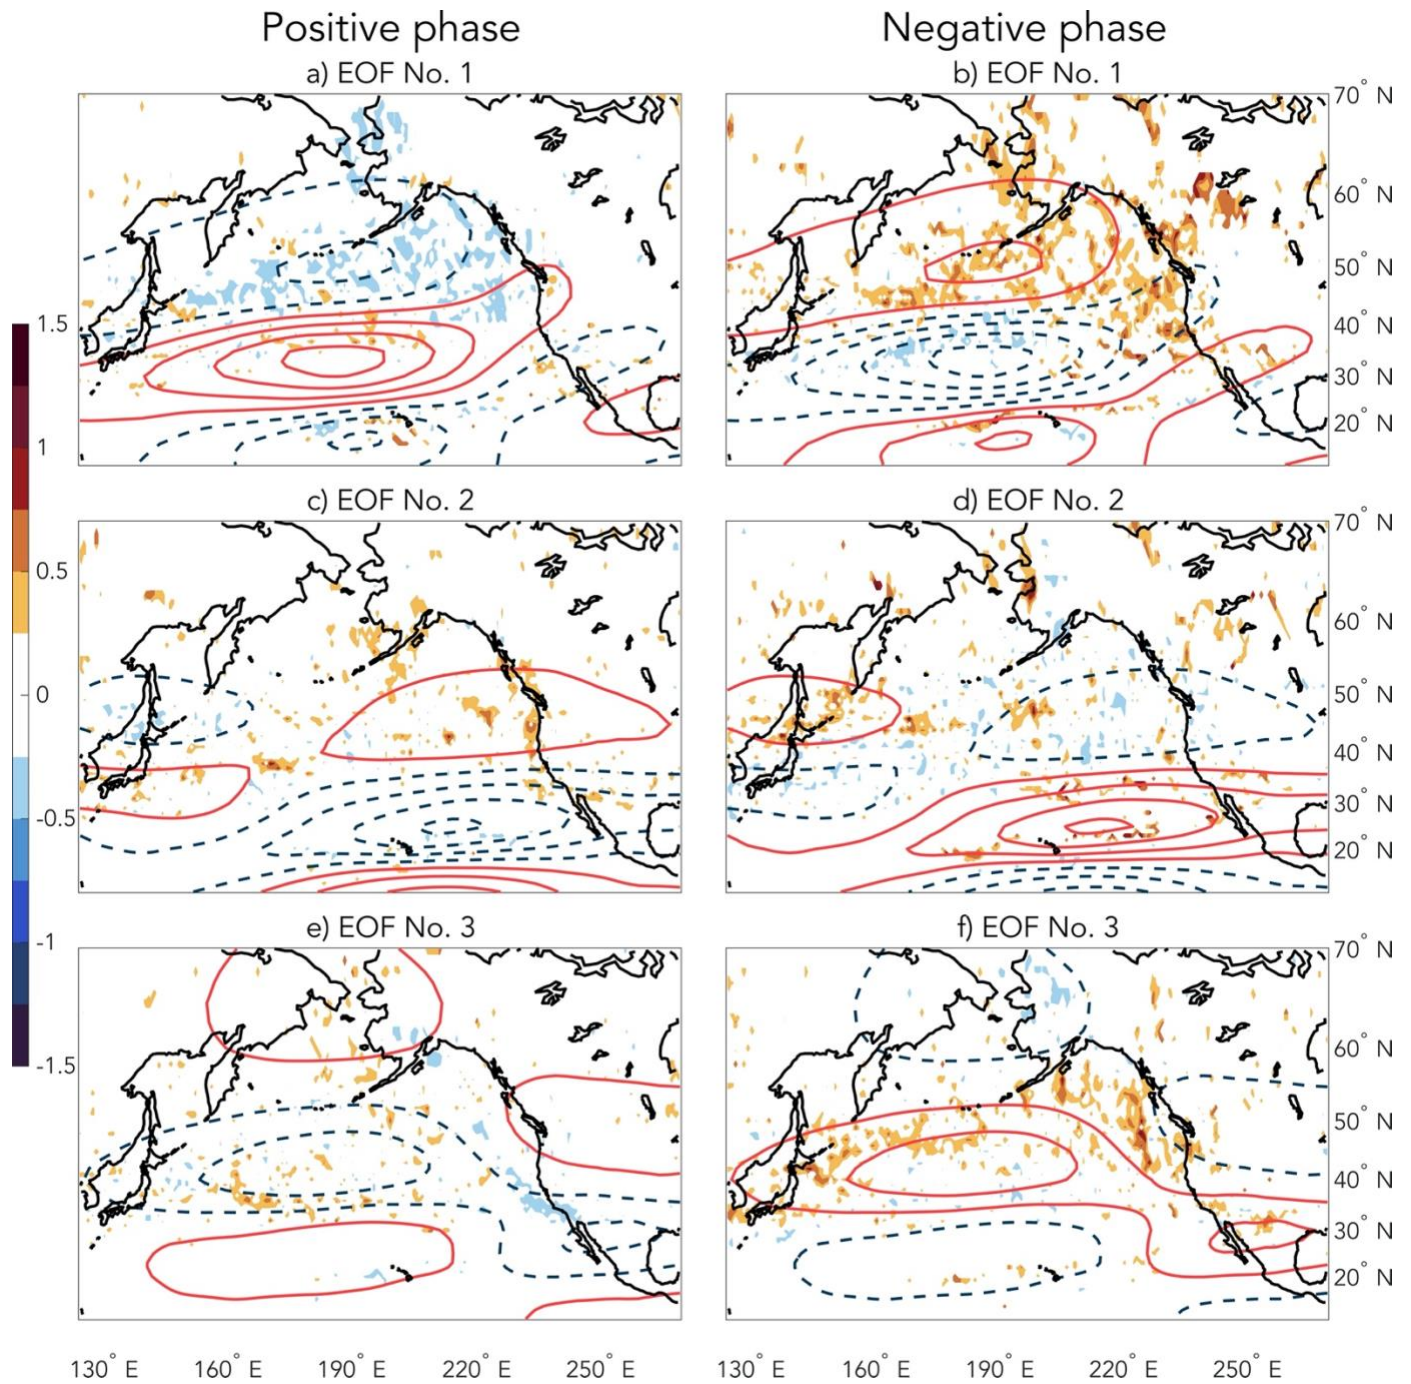

**Figure S6:** Monthly mean (MAM, 1979-2014) frequencies of medium depth tropopause folds (filled contours) for time periods when PCs 1-3 are greater than  $\pm 1$  STDs from climatology (units of STDs). Colored contours show the EOF patterns associated with each composite.

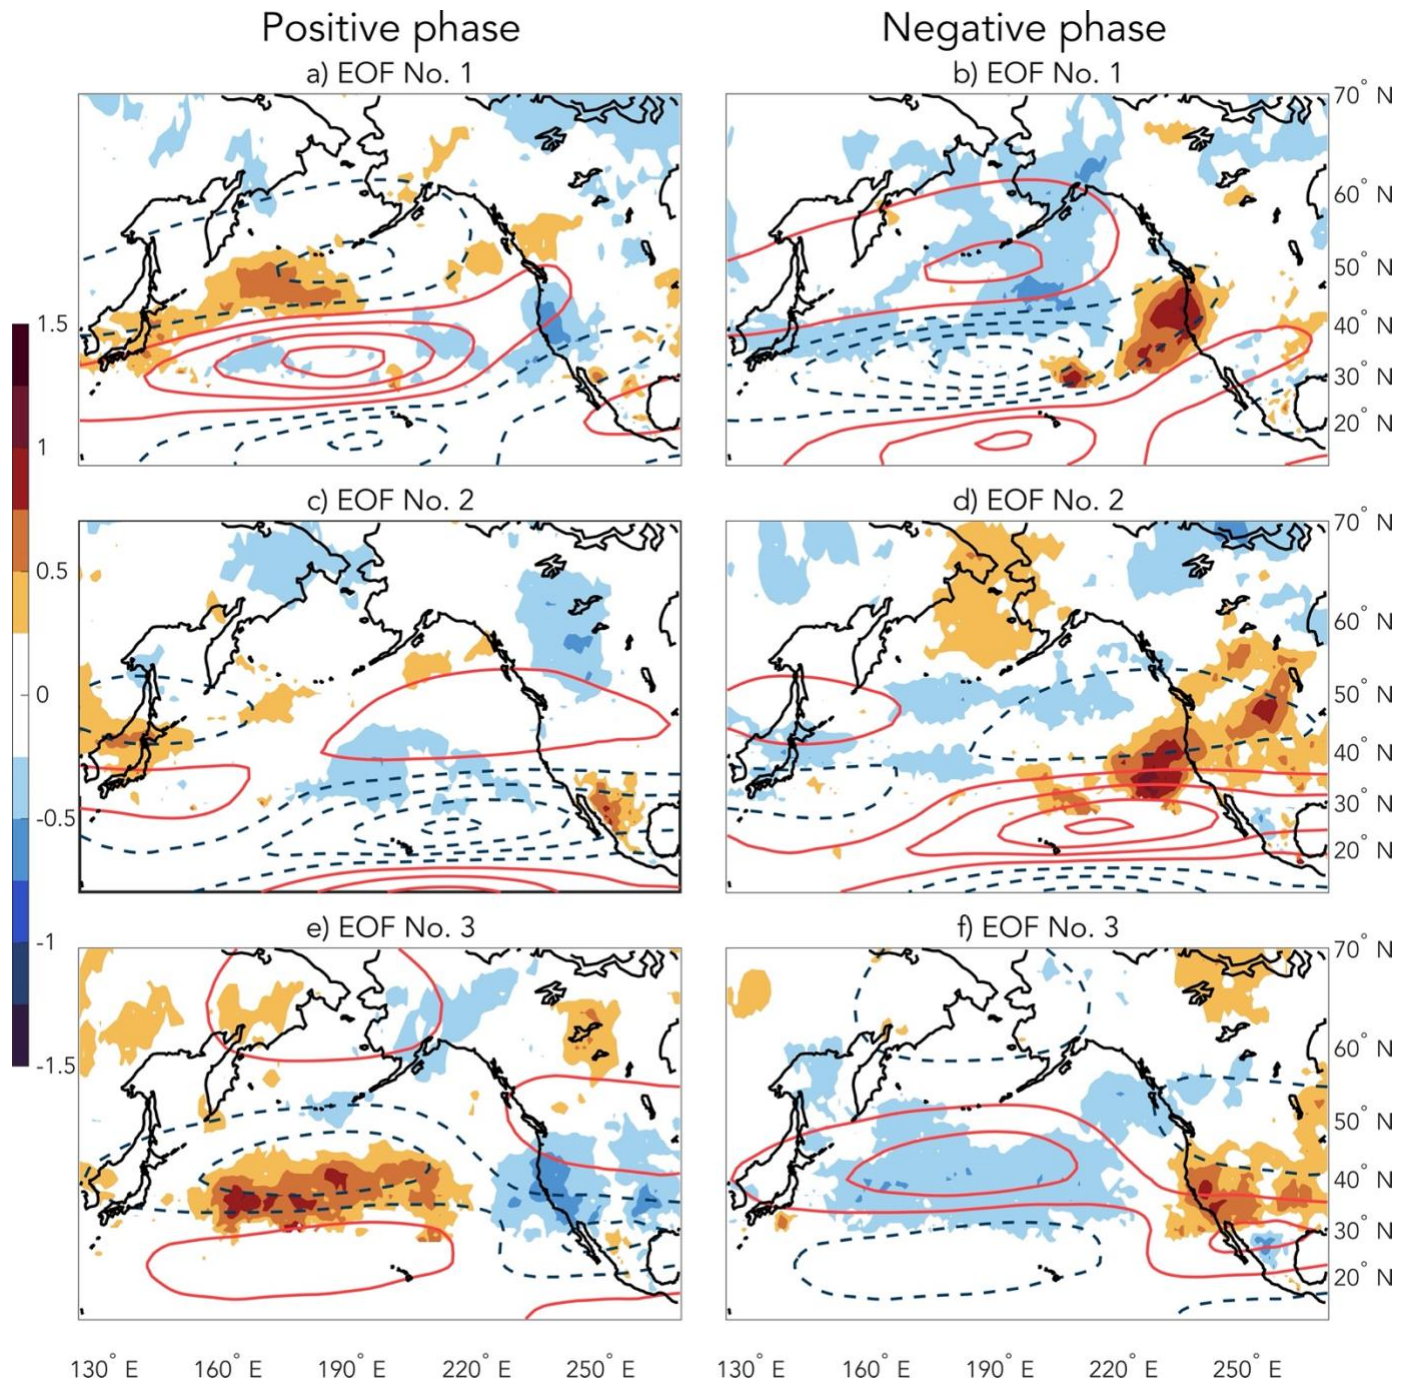

**Figure S7:** Monthly mean (MAM, 1979-2014) frequencies of PV cutoffs on the 310 K isentropic surface (filled contours) for time periods when PCs 1-3 are greater than  $\pm 1$  STDs from climatology (units of STDs). Colored contours show the EOF patterns associated with each composite.



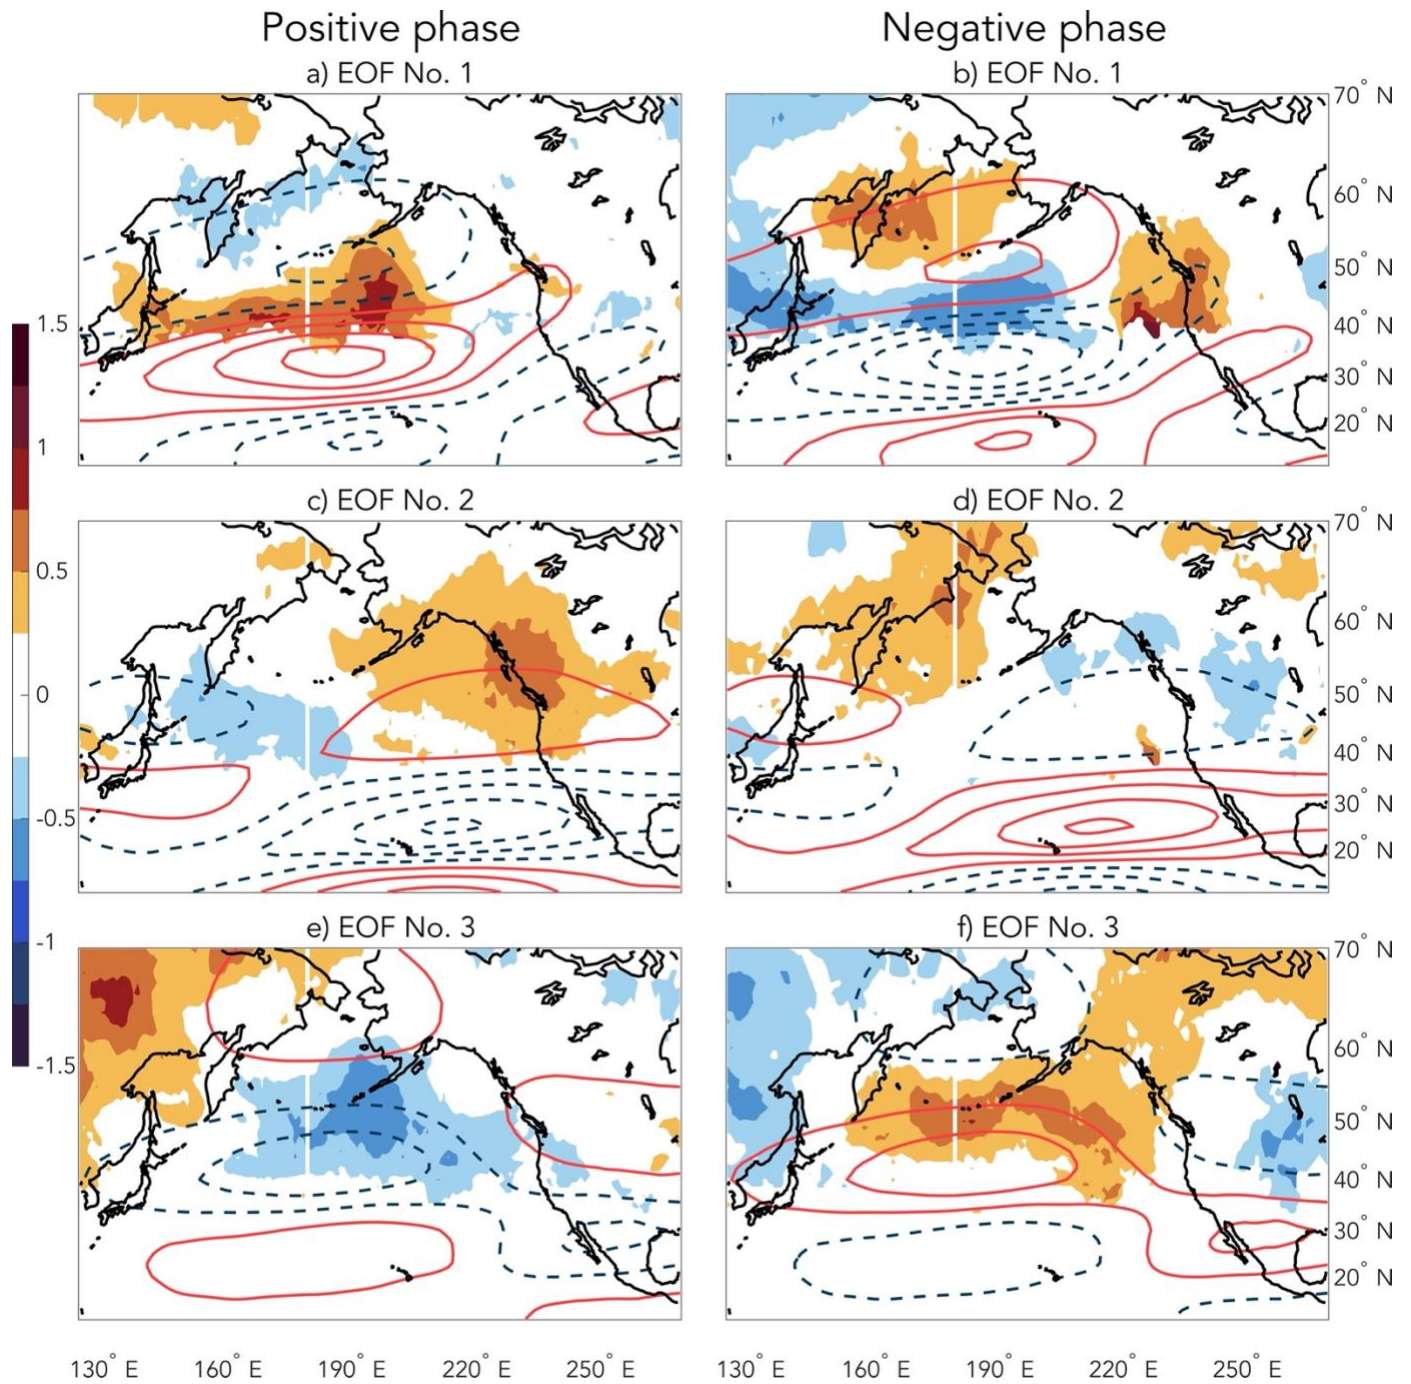

**Figure S8:** Monthly mean (MAM, 1979-2014) frequencies of PV streamers on the 310 K isentropic surface (filled contours) for time periods when PCs 1-3 are greater than  $\pm 1$  STDs from climatology (units of STDs). Colored contours show the EOF patterns associated with each composite.

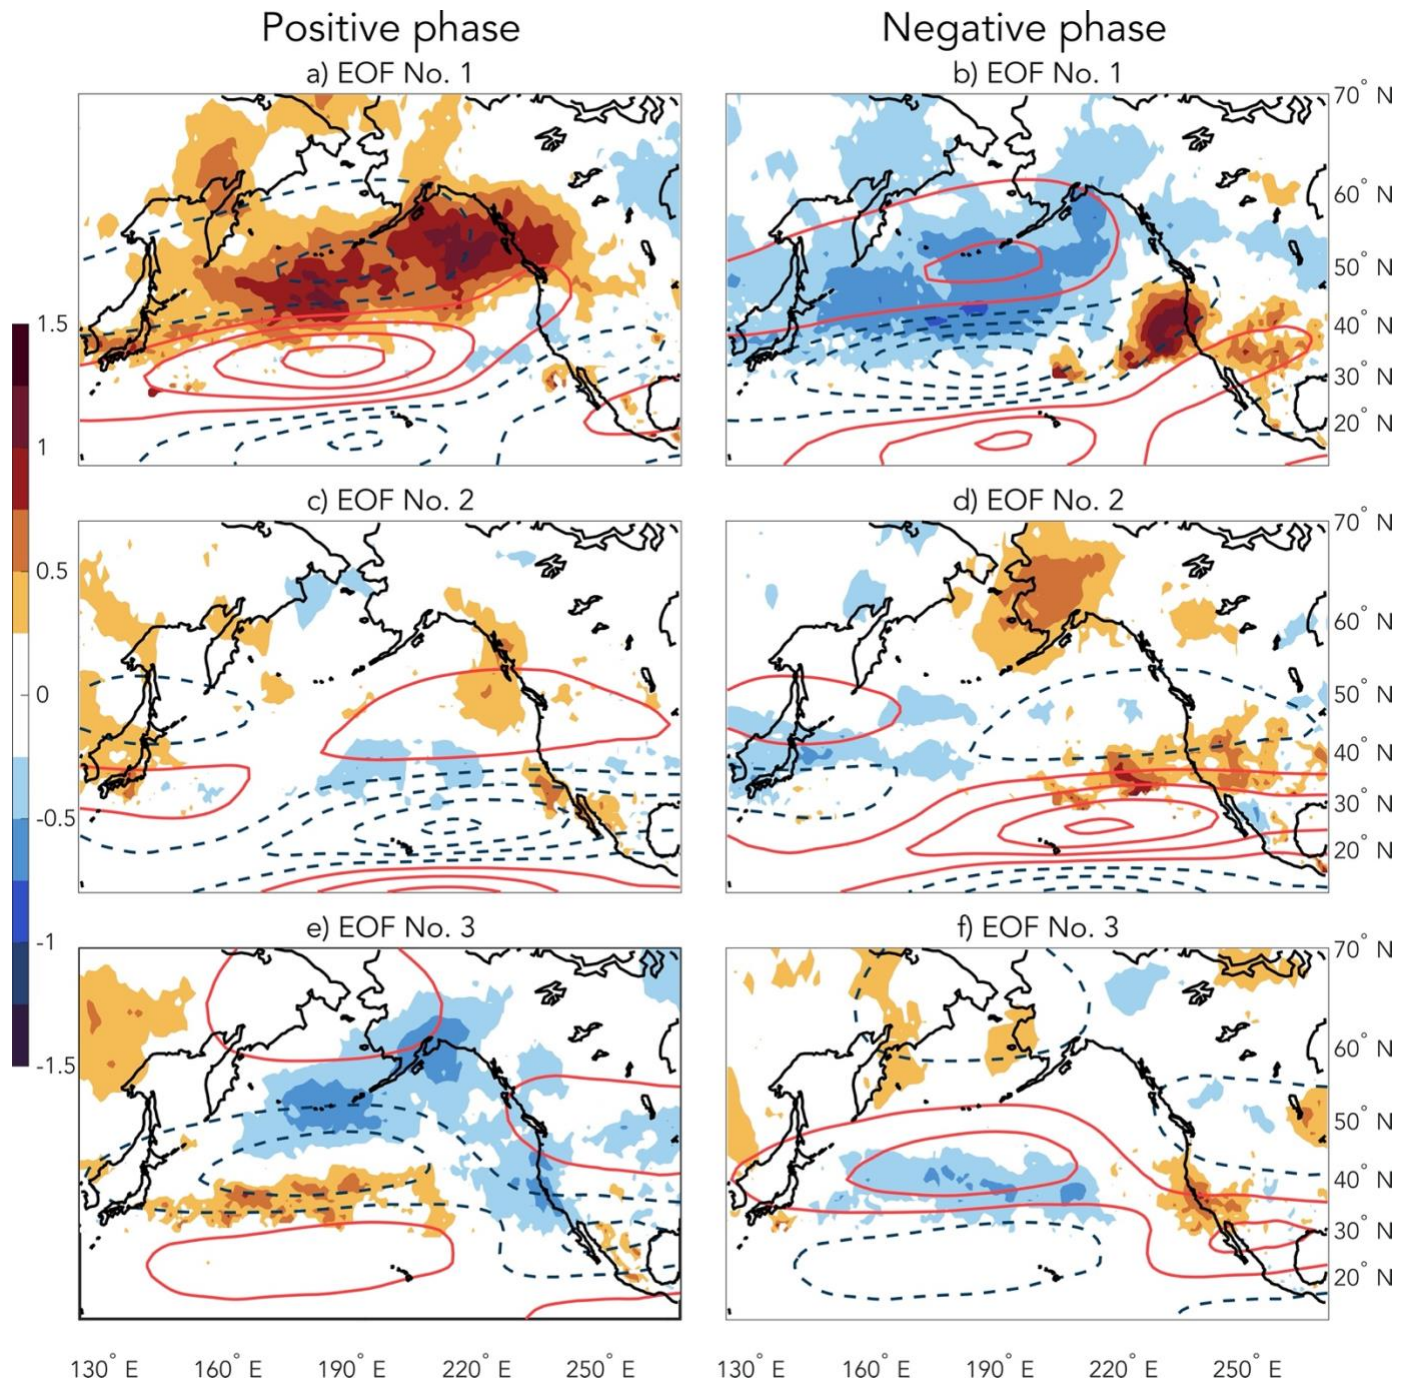

**Figure S9:** Monthly mean (MAM, 1979-2014) frequencies of PV cutoffs on the 305 K isentropic surface (filled contours) for time periods when PCs 1-3 are greater than  $\pm 1$  STDs from climatology (units of STDs). Colored contours show the EOF patterns associated with each composite.



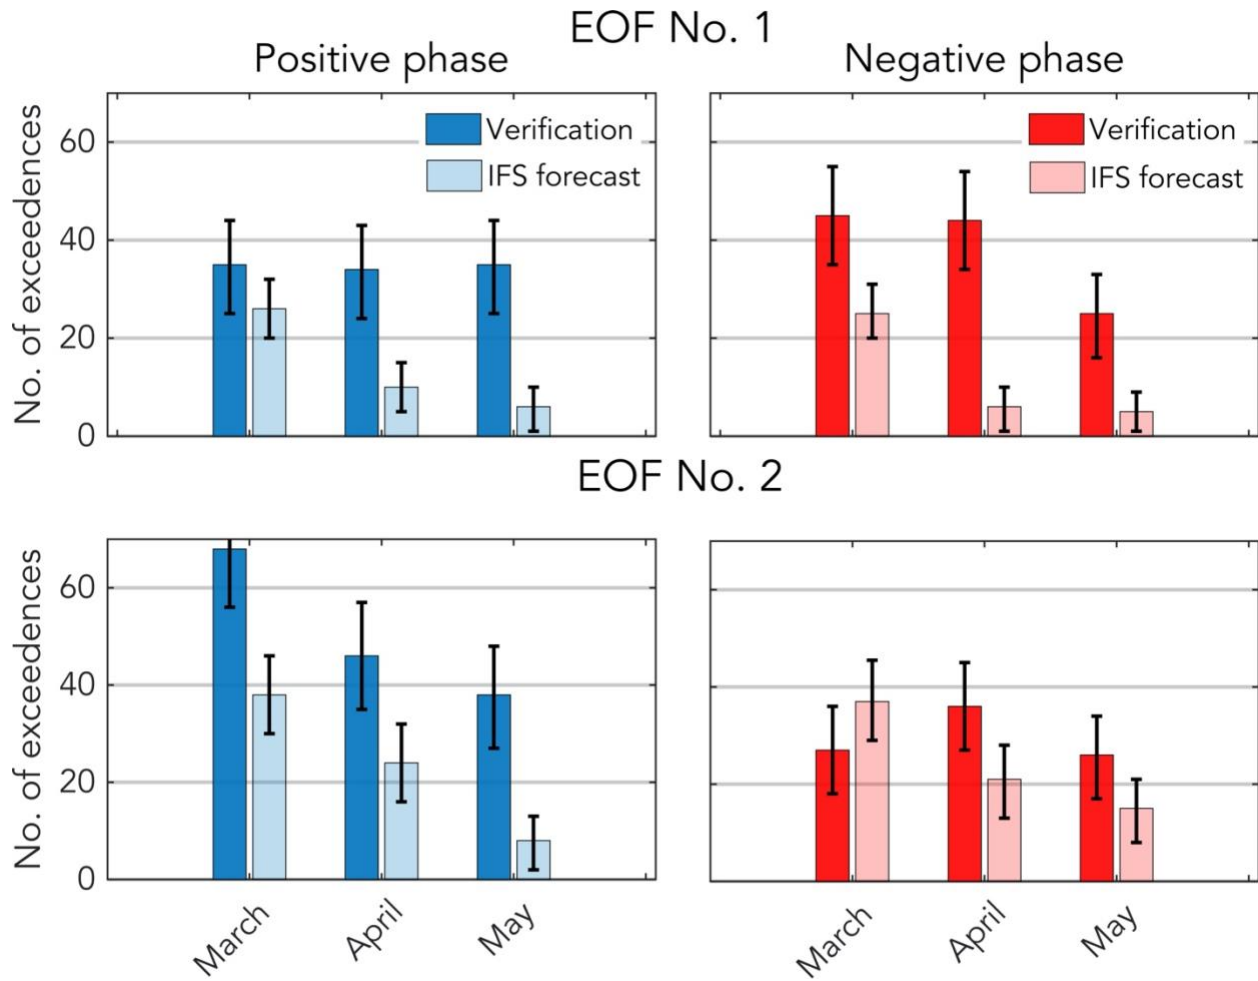

**Figure S10:** Number of times that a weeks 3-5 average verification or forecast exceeded the 0.8 STD threshold for the 1997-2016 hindcast period (i.e., the periods in Fig. 4 where the black or orange lines, respectively, was above or below the dashed horizontal STD reference lines). 95<sup>th</sup> percentile bootstrap confidence intervals are shown as whiskers.
